# Supplementary material for: A new insight into the evolution and functional divergence of FRK genes in Pyrus bretschneideri
Source: R Soc Open Sci. 2018 Jul 18;5(7):171463. doi: 10.1098/rsos.171463 (PMC6083675; doi:10.1098/rsos.171463)
Supplement: Table S2.xlsx [file rsos171463supp4.xlsx]

## Sheet: Table S2
Table S2: Blast2GO annotation details of 49 FRK protein sequences.
Gene names	GO
FvFRK01	GO:0008865,GO:0009506,GO:0005794,GO:0016740,GO:0016773,GO:0000166,GO:0004747,GO:0016301,GO:0005524,GO:0019252,GO:0016310,GO:0005975,GO:0006014
FvFRK02	GO:0008865,GO:0005524,GO:0016740,GO:0019252,GO:0016773,GO:0016310,GO:0000166,GO:0005975,GO:0004747,GO:0016301,GO:0006014
FvFRK03	GO:0008865,GO:0009506,GO:0005794,GO:0016740,GO:0016773,GO:0000166,GO:0004747,GO:0016301,GO:0005524,GO:0019252,GO:0016310,GO:0005975,GO:0006014
FvFRK04	GO:0009536,GO:0008865,GO:0005634,GO:0009507,GO:0016740,GO:0016773,GO:0042793,GO:0005737,GO:0005515,GO:0016301,GO:0009295,GO:0042644,GO:0016310,GO:0009658
FvFRK05	GO:0009536,GO:0008865,GO:0009570,GO:0009507,GO:0016740,GO:0016773,GO:0000166,GO:0004747,GO:0016301,GO:0005524,GO:0019252,GO:0016310,GO:0005975,GO:0006014
PbFRK20	GO:0016740,GO:0016773,GO:0016310,GO:0004747,GO:0016301,GO:0006014
FvFRK06	GO:0008865,GO:0005524,GO:0016740,GO:0019252,GO:0016773,GO:0000166,GO:0016310,GO:0005975,GO:0004747,GO:0016301,GO:0006014
PmFRK12	GO:0016740,GO:0016773,GO:0016310,GO:0004747,GO:0016301,GO:0006014
PmFRK11	GO:0016740,GO:0016773,GO:0016310,GO:0004747,GO:0016301,GO:0006014
PmFRK10	GO:0004001,GO:0009507,GO:0016740,GO:0016773,GO:0016310,GO:0004747,GO:0015979,GO:0016301,GO:0006014
PmFRK15	GO:0009536,GO:0008865,GO:0009507,GO:0016740,GO:0042644,GO:0016773,GO:0016310,GO:0042793,GO:0009658,GO:0016301,GO:0009662,GO:0009295
PmFRK14	GO:0016032,GO:0004001,GO:0005507,GO:0016740,GO:0016773,GO:0005829,GO:0000166,GO:0016301,GO:0044209,GO:0005524,GO:0016310,GO:0006166,GO:0006169,GO:0005886
PmFRK13	GO:0008865,GO:0005524,GO:0016740,GO:0019252,GO:0016773,GO:0016310,GO:0000166,GO:0005975,GO:0004747,GO:0016301,GO:0006014
PbFRK12	GO:0008865,GO:0005634,GO:0016740,GO:0016310,GO:0005737,GO:0016301
PbFRK13	GO:0009570,GO:0009507,GO:0016740,GO:0016773,GO:0016310,GO:0005975,GO:0004747,GO:0016301,GO:0006014
PbFRK10	GO:0004001,GO:0016740,GO:0016310,GO:0016301
PbFRK11	GO:0009536,GO:0008865,GO:0009570,GO:0009507,GO:0016740,GO:0016773,GO:0000166,GO:0004747,GO:0016301,GO:0005524,GO:0019252,GO:0016310,GO:0005975,GO:0006014
PmFRK01	GO:0005524,GO:0019140,GO:0016740,GO:0016773,GO:0016310,GO:0000166,GO:0010264,GO:0016301
PpFRK03	GO:0008865,GO:0016740,GO:0016020,GO:0016773,GO:0005829,GO:0016021,GO:0016310,GO:0004747,GO:0016301,GO:0006014
PpFRK04	GO:0008865,GO:0016740,GO:0016773,GO:0005829,GO:0000166,GO:0004747,GO:0016301,GO:0005524,GO:0019252,GO:0016020,GO:0016021,GO:0016310,GO:0005975,GO:0006014,GO:0046686
PpFRK01	GO:0008865,GO:0009506,GO:0005794,GO:0016740,GO:0016773,GO:0000166,GO:0004747,GO:0016301,GO:0005524,GO:0019252,GO:0016310,GO:0005975,GO:0006014
PpFRK02	GO:0009536,GO:0008865,GO:0009507,GO:0016740,GO:0042644,GO:0016773,GO:0016310,GO:0042793,GO:0009658,GO:0016301,GO:0009662,GO:0009295
PmFRK05	GO:0009536,GO:0008865,GO:0009570,GO:0009507,GO:0016740,GO:0016773,GO:0000166,GO:0004747,GO:0016301,GO:0005524,GO:0019252,GO:0016310,GO:0005975,GO:0006014
PpFRK07	GO:0008865,GO:0005524,GO:0016740,GO:0019252,GO:0016773,GO:0016310,GO:0000166,GO:0005975,GO:0004747,GO:0016301,GO:0006014
PmFRK04	GO:0009570,GO:0009507,GO:0016740,GO:0016773,GO:0016310,GO:0004747,GO:0016301,GO:0006014
PpFRK08	GO:0008865,GO:0005634,GO:0016740,GO:0016310,GO:0005737,GO:0016301
PmFRK03	GO:0008865,GO:0009506,GO:0005794,GO:0016740,GO:0016773,GO:0000166,GO:0004747,GO:0016301,GO:0005524,GO:0019252,GO:0016310,GO:0005975,GO:0006014
PpFRK05	GO:0009536,GO:0008865,GO:0009570,GO:0009507,GO:0016740,GO:0016773,GO:0000166,GO:0004747,GO:0016301,GO:0005524,GO:0019252,GO:0016310,GO:0005975,GO:0006014
PmFRK02	GO:0004001,GO:0016740,GO:0016310,GO:0016301
PpFRK06	GO:0009536,GO:0008865,GO:0005634,GO:0009507,GO:0016740,GO:0016773,GO:0042793,GO:0005737,GO:0005515,GO:0016301,GO:0009295,GO:0042644,GO:0016310,GO:0009658
PmFRK09	GO:0008865,GO:0016740,GO:0016773,GO:0005829,GO:0000166,GO:0004747,GO:0016301,GO:0005524,GO:0019252,GO:0016020,GO:0016021,GO:0016310,GO:0005975,GO:0006014,GO:0046686
PmFRK08	GO:0016032,GO:0004001,GO:0005507,GO:0016740,GO:0016773,GO:0005829,GO:0000166,GO:0016301,GO:0044209,GO:0005524,GO:0016310,GO:0006166,GO:0006169,GO:0005886
PbFRK18	GO:0008865,GO:0005524,GO:0016740,GO:0019252,GO:0016773,GO:0016310,GO:0000166,GO:0005975,GO:0004747,GO:0016301,GO:0006014
PmFRK07	GO:0008865,GO:0016740,GO:0016773,GO:0005829,GO:0000166,GO:0004747,GO:0016301,GO:0005524,GO:0019252,GO:0016020,GO:0016021,GO:0016310,GO:0005975,GO:0006014,GO:0046686
PbFRK19	GO:0009536,GO:0008865,GO:0009570,GO:0009507,GO:0016740,GO:0016773,GO:0000166,GO:0004747,GO:0016301,GO:0005524,GO:0019252,GO:0016310,GO:0005975,GO:0006014
PmFRK06	GO:0008865,GO:0005524,GO:0016740,GO:0019252,GO:0016773,GO:0016310,GO:0000166,GO:0005975,GO:0004747,GO:0016301,GO:0006014
PbFRK16	GO:0004001,GO:0016740,GO:0016310,GO:0016301
PbFRK17	GO:0004001,GO:0016740,GO:0016310,GO:0016301
PbFRK14	GO:0005524,GO:0019140,GO:0016740,GO:0016773,GO:0016310,GO:0000166,GO:0010264,GO:0016301
PbFRK15	GO:0009536,GO:0008865,GO:0009507,GO:0016740,GO:0042644,GO:0016773,GO:0016310,GO:0042793,GO:0009658,GO:0016301,GO:0009662,GO:0009295
PbFRK01	GO:0016032,GO:0004001,GO:0005507,GO:0016740,GO:0016773,GO:0005829,GO:0000166,GO:0016301,GO:0044209,GO:0005524,GO:0016310,GO:0006166,GO:0006169,GO:0005886
PbFRK02	GO:0008865,GO:0016740,GO:0016020,GO:0016773,GO:0016021,GO:0016310,GO:0004747,GO:0016301,GO:0006014
PbFRK09	GO:0004001,GO:0009507,GO:0016740,GO:0016773,GO:0016310,GO:0004747,GO:0015979,GO:0016301,GO:0006014
PbFRK07	GO:0008865,GO:0005634,GO:0016740,GO:0016310,GO:0005737,GO:0016301
PbFRK08	GO:0008865,GO:0016740,GO:0016773,GO:0005829,GO:0000166,GO:0004747,GO:0016301,GO:0005524,GO:0019252,GO:0016020,GO:0016021,GO:0016310,GO:0005975,GO:0006014,GO:0046686
PbFRK05	GO:0005524,GO:0019140,GO:0016740,GO:0016773,GO:0016310,GO:0000166,GO:0010264,GO:0016301
PbFRK06	GO:0016740,GO:0016773,GO:0016310,GO:0004747,GO:0016301,GO:0006014
PbFRK03	GO:0008865,GO:0016740,GO:0016773,GO:0005829,GO:0016310,GO:0004747,GO:0016301,GO:0006014
PbFRK04	GO:0009570,GO:0009507,GO:0016740,GO:0016773,GO:0016310,GO:0004747,GO:0016301,GO:0006014
