# Supplementary material for: A new insight into the evolution and functional divergence of FRK genes in Pyrus bretschneideri
Source: R Soc Open Sci. 2018 Jul 18;5(7):171463. doi: 10.1098/rsos.171463 (PMC6083675; doi:10.1098/rsos.171463)
Supplement: Table S5.xlsx [file rsos171463supp7.xlsx]

## Sheet: Sheet2
Table S5: Distribution of DNA elements in the promoter sequences of FRK genes.
Gene name	Skn-1_motif	GCN4_motif	CCGTCC-box	CAT-box	MRE	circadian	MSA-like	O2-site	BOX 4		AuxRR-core	TGA-element	TGACG-motif	ERE	GARE-motif	P-box	TATC-box	ABRE		ARE	GC-motif	Box-W1	HSE	LTR	MBS	TC-rich repeats
FvFRK01	5	0	0	0	0	0	0	0	2		0	0	3	0	0	0	0	1		12	0	0	2	1	3	0
FvFRK02	7	0	0	0	2	2	0	1	1		1	1	3	0	1	1	1	0		2	0	1	1	1	4	1
FvFRK03	7	1	0	1	0	1	0	2	0		0	0	0	0	2	0	1	0		2	0	1	2	0	1	1
FvFRK04	3	1	0	1	1	6	0	0	0		0	0	6	0	2	1	0	0		4	0	0	1	0	2	0
FvFRK05	1	1	0	2	0	5	0	0	0		0	0	0	0	1	0	0	1		4	0	1	1	0	5	1
PbFRK01	2	1	1	0	0	3	0	0	0		0	0	1	0	1	0	0	0		1	0	2	5	1	5	4
PbFRK02	1	2	0	0	0	3	0	0	3		0	0	0	0	0	1	1	0		4	0	1	0	1	2	3
PbFRK03	4	0	0	3	0	2	0	2	0		0	0	0	0	0	1	1	0		4	0	1	0	1	3	3
PbFRK04	5	2	0	0	0	2	0	2	5		0	0	4	2	1	0	0	1		0	0	1	0	1	2	2
PbFRK05	0	0	0	0	0	1	0	1	6		0	0	0	0	0	0	0	3		0	0	0	3	1	0	3
PbFRK06	4	1	0	1	0	2	1	3	0		0	0	1	0	1	1	0	0		0	1	3	0	1	2	3
PbFRK07	3	1	2	0	0	5	1	1	3		0	0	4	0	1	0	0	1		1	2	0	2	0	0	3
PbFRK08	3	2	0	1	0	0	0	1	3		0	0	0	0	1	0	0	2		4	0	2	2	0	0	0
PbFRK09	2	0	0	0	0	3	0	0	0		1	0	2	0	2	0	0	6		2	3	0	0	0	1	2
PbFRK10	5	0	0	0	0	4	1	2	0		0	0	0	2	0	1	0	2		1	0	0	3	0	2	1
PbFRK11	7	2	0	0	0	7	0	1	2		0	0	4	0	1	0	0	1		2	0	1	3	0	1	3
PbFRK12	2	1	1	2	1	3	0	0	1		1	0	1	0	0	1	0	1		2	0	0	1	0	1	2
PbFRK13	0	0	0	1	0	1	0	0	4		0	0	5	0	1	2	0	0		0	0	0	3	0	2	1
PbFRK14	4	1	0	4	1	1	0	0	0		0	0	4	0	3	0	0	1		1	0	0	0	2	2	3
PbFRK15	1	1	1	0	1	4	0	0	3		0	1	3	0	0	0	1	3		2	0	1	1	1	3	1
PbFRK16	6	2	0	0	0	1	0	0	1		0	3	2	1	0	0	0	0		0	0	0	2	1	4	1
PbFRK17	4	0	1	0	1	0	0	0	3		0	2	2	0	1	0	0	0		1	0	0	0	0	1	3
PbFRK18	3	1	0	0	0	2	0	0	4		0	0	2	2	1	0	0	1		3	0	0	1	4	7	1
PbFRK19	5	0	0	0	0	0	0	0	3		1	0	4	0	0	1	0	1		1	1	0	2	1	1	1
PbFRK20	1	0	0	1	2	2	1	0	5		0	0	2	2	1	2	0	1		0	1	0	0	2	2	2
PmFRK01	4	2	1	3	0	2	0	1	0		0	2	1	3	1	1	1	2		1	0	0	0	0	0	0
PmFRK02	4	0	2	1	0	1	0	0	2		0	0	2	0	1	0	0	0		1	0	0	1	1	0	1
PmFRK03	3	0	0	1	2	2	0	0	6		0	1	0	0	1	0	1	0		2	1	2	1	2	0	1
PmFRK04	3	2	0	0	0	1	0	2	0		1	0	2	0	2	2	0	1		1	0	0	1	0	2	1
PmFRK05	3	0	0	0	0	1	0	3	6		1	0	1	0	1	2	0	5		2	0	0	0	1	3	3
PmFRK06	2	0	0	1	0	1	1	0	2		0	0	0	0	1	2	0	1		3	0	0	0	1	4	0
PmFRK07	1	0	0	0	1	1	0	0	2		0	0	1	3	0	1	1	1		3	0	1	2	3	1	1
PmFRK08	3	0	0	0	0	1	0	1	0		0	1	1	0	3	2	0	1		0	0	0	0	0	1	1
PmFRK09	5	1	0	0	0	1	0	0	3		0	0	2	0	2	0	0	1		1	0	2	1	0	1	0
PmFRK10	1	1	1	0	0	3	0	0	1		1	1	1	2	1	1	0	4		3	0	0	0	0	1	2
PmFRK11	9	2	1	2	1	3	0	2	0		0	0	1	2	1	1	0	2		1	1	0	2	1	4	5
PmFRK12	8	2	0	1	1	0	0	1	0		0	2	0	4	1	0	0	3		1	0	3	4	0	1	3
PmFRK13	5	1	0	3	0	5	0	0	6		0	0	1	0	2	0	0	0		0	0	2	0	1	3	2
PmFRK14	4	1	0	1	0	2	0	1	0		0	1	2	0	1	1	0	0		1	0	0	1	0	4	2
PmFRK15	3	0	0	0	0	2	0	0	1		0	0	1	1	0	4	0	0		0	0	0	2	0	4	0
PpFRK01	3	0	0	1	1	2	0	1	6		0	0	1	0	0	0	1	1		1	1	2	2	1	0	2
PpFRK02	2	1	1	0	0	3	0	0	2		0	1	2	0	4	0	0	2		1	0	0	0	0	3	1
PpFRK03	1	0	0	1	0	0	0	0	2		0	0	0	6	1	1	0	0		4	0	3	4	1	1	1
PpFRK04	0	1	0	0	0	1	0	0	1		0	0	1	0	2	1	0	0		1	0	1	3	0	1	1
PpFRK05	3	1	0	0	0	1	0	1	4		0	0	1	0	0	0	1	3		2	0	0	1	0	1	2
PpFRK06	3	0	1	0	1	2	0	1	0		1	1	4	0	3	2	0	2		3	1	1	0	0	1	2
PpFRK07	6	1	0	2	0	6	0	0	4		0	0	1	0	2	0	0	0		0	0	2	0	2	3	3
PpFRK08	8	0	0	2	0	2	0	1	1		0	0	3	0	1	2	0	0		1	0	1	0	0	4	3
