# Supplementary material for: A new insight into the evolution and functional divergence of FRK genes in Pyrus bretschneideri
Source: R Soc Open Sci. 2018 Jul 18;5(7):171463. doi: 10.1098/rsos.171463 (PMC6083675; doi:10.1098/rsos.171463)
Supplement: Table S6.xlsx [file rsos171463supp8.xlsx]

## Sheet: Sheet1
Table S6: Primers in this study.
Primer name	Sequence (5'-3')
PbFRK11-F	CTCTTCATGCTACTGCTT
PbFRK11-R	TCTGACTGACCTTTGACT
PbFRK13-F	CAATGGCACGAACAAGTT
PbFRK13-R	AATGGGTTTCTTCTATTGGATT
PbFRK19-F	TGGCTCTTCATTCTACTG
PbFRK19-R	GACTGTCCGTTGACTAAA
PbFRK03-F	GGCTTGGGTTCAGACATT
PbFRK03-R	CAGAGCACCACAACCATT
PbFRK08-F	TAAAGACGCATCCTCAGA
PbFRK08-R	ACAAAGTCAATTAGCATTTCC
PbFRK18-F	GCTGTAGATATTACACTAA
PbFRK18-R	AAGATGGACATATCATTG
PbFRK02-F	GTCGCTCAAAACATCCCTA
PbFRK02-R	CGGAGGTTGTTGATTGTG
PbFRK01-F	TATGACATCAAGCCAAAC
PbFRK01-R	ACCTCCAGCAATATACTC
PbFRK17-F	ATAGTTTCCCATCAGTTG
PbFRK17-R	TTGTGTCGTGTATTTATAGA
PbFRK16-F	TTGTATGGACTGGTGAAGG
PbFRK16-R	AATAACAGATCCGCCACT
PbFRK10-F	TTGTTGTTGAGGTATGGT
PbFRK10-R	GCAGAAGAGGTGATCTAA
PbFRK12-F	CCGCCGGATAAGCAATAC
PbFRK12-R	CTTAAGTCCTAATCTTGCAGCT
PbFRK07-F	GCATCTAATCTCAAGCAGAATG
PbFRK07-R	CACTTCCATCTACGACCAA
PbFRK06 -F	TAGTTTTGTTGGAGCAGTTC
PbFRK06 -R	AGATAGCAGCCACTTGAG
PbFRK04-F	CCGAACCAGAGCAATCAA
PbFRK04-R	CGTCTATGGAGAAACAAGGAAA
PbFRK15-F	GCTTCAGGGTCTTAAATTG
PbFRK15-R	CTGAGTTCTCCGAGTTTA
PbFRK09-F	GCCATGCTTATGCTGTTC
PbFRK09-R	CAGGAACTCGTCATCAACA
PbFRK14-F	ACCCTAACCATCTTCTTATTCTT
PbFRK14-R	GTTTGGATTCGATTGTGTGAT
PbFRK05-F	AACTACTACCACGACGTT
PbFRK05-R	CGAAGACATTGGAGATGAAG
PbFRK20-F	CGCAATAGCAGTTTACAT
PbFRK20-R	TCAAGCATCACATGGATA
